# Supplementary material
Source: publisher figshare collection journal article supplement (https://karger.figshare.com/ndownloader/files/14392862)
Supplement: Supplementary file 1 [file 14392862]

**Electronic Supplementary Material: Navarrete, A. F., Blezer, E. L. A., Pagnotta, M., de Viet, E. S. M., Todorov, O. S., Lindenfors, P., Laland, K. N. & Reader, S. M. (2018). Primate brain anatomy: New volumetric MRI measurements for neuroanatomical studies. *Brain, Behavior and Evolution* 91:109-117. DOI: 10.1159/000488136.**

**See also the 2019 erratum: DOI: 10.1159/000496658.**

## Table Legends

**Table 1** (electronic version of Table 1 in main text). Mean brain component volumes (in mm<sup>3</sup>) for 39 primate species measured in the present study. Supplementary Table S1 provides the individual-level morphological dataset including additional samples, additional brain areas (hemispheres, corpus callosum and lateral geniculate nuclei), lateralized measurements, specimen and individual details, and the list of specimens included in the means. Source: PBB: Primate Brain Bank, Netherlands Institute of Neuroscience; GANP: Great Ape Neuroscience Project.

**Supplementary Table S1.** Individual specimen details, morphological data, and all brain measurements. The Netherlands Institute of Neuroscience Primate Brain Bank records method of preservation, sex, age, body mass and brain mass of animals and the post-mortem delay. Other specimens were MRIs from Other Sources (see erratum for details), measured in the current study. For 'Other Sources' scans the identifier is the studbook number for the great apes and a numerical identifier for the capuchins. Where alternative identifiers have been used in previous publications, we give these in brackets. Grey data columns indicate bilateral measurements. Samples marked 'No' under 'Included in Table 1' had damage or other problems compromising brain measurements, and thus were not included in our final dataset (i.e. Table 1, main text). Since no measurements are available in the literature for some of these specimens, they are presented here. Note that the medulla was frequently incomplete in PBB specimens. Other abbreviations: PBS: phosphate-buffered saline + 0.1% sodium azide; NA: not available.

**Supplementary Table S2.** Brain component volumes corrected to the species mean brain volumes from the serial section histological measurements of Stephan et al. [1981] and Zilles & Rehkemper [1988], with percent error compared to these sources. These corrections were conducted to compare the datasets: note that mean species brain volumes are available based on more extensive databases. Serial section histological measurements of the neocortical grey came from Frahm et al. [1982]. Source: PBB: Primate Brain Bank, Netherlands Institute of Neuroscience; GANP: Great Ape Neuroscience Project. Other abbreviations: NA: not available.

**Supplementary Table S3.** Percent errors between the current dataset and three sets of independent measurements of the same specimens: de Viet [2009], Todorov [2010] and

Sherwood and colleagues [Sherwood et al., 2004; Barks et al., 2015]. Todorov's [2010] whole brain measure excluded brainstem and thus are consistently smaller than our measurements. Brain source: PBB: Primate Brain Bank, Netherlands Institute of Neuroscience; GANP: Great Ape Neuroscience Project. For GANP scans the identifier is the studbook number, with alternative identifiers used in previous publications in brackets. Other abbreviations: NR: Not reported/available.
